1 Host-associated fungal communities are determined by host phylogeny and exhibit  
2 widespread associations with the bacterial microbiome

3

4 Xavier A. Harrison<sup>1</sup> #, Allan D. McDevitt<sup>2</sup>, Jenny C. Dunn<sup>3</sup>, Sarah Griffiths<sup>4</sup>, Chiara Benvenuto<sup>2</sup>,  
5 Richard Birtles<sup>2</sup>, Jean P. Boubli<sup>2</sup>, Kevin Bown<sup>2</sup>, Calum Bridson<sup>4,5</sup>, Darren Brooks<sup>2</sup>, Samuel S.  
6 Browett<sup>2</sup>, Ruth F. Carden<sup>6,7</sup>, Julian Chantrey<sup>8</sup>, Friederike Clever<sup>4,9</sup>, Ilaria Coscia<sup>2</sup>, Katie L. Edwards<sup>10</sup>,  
7 Natalie Ferry<sup>2</sup>, Ian Goodhead<sup>2</sup>, Andrew Highlands<sup>2</sup>, Jane Hopper<sup>11</sup>, Joseph Jackson<sup>2</sup>, Robert Jehle<sup>2</sup>,  
8 Mariane da Cruz Kaizer<sup>2</sup>, Tony King<sup>11,12</sup>, Jessica M. D. Lea<sup>5</sup>, Jessica L. Lenka<sup>2</sup>, Alexandra  
9 McCubbin<sup>13</sup>, Jack McKenzie<sup>2</sup>, Bárbara Lins Caldas de Moraes<sup>14</sup>, Denise B. O'Meara<sup>15</sup>, Poppy  
10 Pescod<sup>2</sup>, Richard F. Preziosi<sup>4</sup>, Jennifer K. Rowntree<sup>4</sup>, Susanne Shultz<sup>5</sup>, Matthew J. Silk<sup>1</sup>, Jennifer E.  
11 Stockdale<sup>13,16</sup>, William O. C. Symondson<sup>13</sup>, Mariana Villalba de la Pena<sup>5</sup>, Susan L. Walker<sup>10</sup>, Michael  
12 D. Wood<sup>2</sup>, Rachael E. Antwis<sup>2</sup> #

13

14 # Corresponding authors:

15 Dr Rachael Antwis, University of Salford, [r.e.antwis@salford.ac.uk](mailto:r.e.antwis@salford.ac.uk)

16 Dr Xavier Harrison, University of Exeter, [x.harrison@exeter.ac.uk](mailto:x.harrison@exeter.ac.uk)

17

18 1. School of Biosciences, University of Exeter, UK. 2. School of Science, Engineering and Environment, University of Salford,  
19 UK. 3. School of Life Sciences, Joseph Banks Laboratories, University of Lincoln, UK. 4. Ecology and Environment Research  
20 Centre, Department of Natural Sciences, Manchester Metropolitan University, UK. 5. School of Earth and Environmental  
21 Sciences, University of Manchester, UK. 6. School of Archaeology, University College Dublin, Ireland. 7. Wildlife Ecological &  
22 Osteological Consultancy, Wicklow, Ireland. 8. Institute of Veterinary Science, University of Liverpool, UK. 9. Smithsonian  
23 Tropical Research Institute, Ancon, Republic of Panama. 10. North of England Zoological Society, Chester Zoo, Upton-by-  
24 Chester, UK. 11. The Aspinnall Foundation, Port Lympne Reserve, Hythe, Kent, UK. 12. School of Anthropology and  
25 Conservation, University of Kent. 13. School of Biosciences, University of Cardiff, UK. 14. Department of Zoology, Federal  
26 University of Pernambuco, Recife, Brazil. 15. School of Science & Computing, Waterford Institute of Technology, Ireland. 16.  
27 School of Life Sciences, University of Nottingham, UK

28

29 **ABSTRACT**

30 Interactions between hosts and their resident microbial communities are a fundamental component of  
31 fitness for both agents. Despite a recent proliferation of research on interactions between animals and  
32 their associated bacterial communities, comparative evidence from fungal communities is lacking,  
33 especially in natural populations. This disparity means knowledge of host-microbe interactions is  
34 biased towards the bacterial microbiome. Using samples from 49 species from eight metazoan  
35 classes, we demonstrate that the ecological distance between both fungal and bacterial components  
36 of the microbiome shift in tandem with host phylogenetic distance. Though so-called phyllosymbiosis  
37 has been shown in bacterial communities, we extend previous knowledge by demonstrating that the  
38 magnitude of shifts in fungal and bacterial community structure across host phylogeny are correlated.  
39 These data are indicative of coordinated recruitment by hosts for specific suites of microbes, and  
40 potentially selection for bacterial-fungal interactions across a broad taxonomic range of host species.  
41 Using co-occurrence networks comprising both microbial groups, we illustrate that fungi form a critical  
42 component of microbial interaction networks, and that the strength and frequency of such interactions  
43 vary across host taxonomic groups. Collectively these data indicate fungal microbiomes may play a  
44 key role in host fitness and suggest an urgent need to study multiple agents of the animal microbiome  
45 to accurately determine the strength and ecological significance of host-microbe interactions.

## 46 INTRODUCTION

47 Multicellular organisms support diverse microbial communities that are critical for physiological  
48 functioning, immunity, development, evolution, behaviour, and even conservation<sup>1-3</sup>. Variability in  
49 host-associated microbiome composition may explain asymmetries among hosts in key traits  
50 including susceptibility to disease<sup>4,5</sup>, fecundity<sup>6</sup>, and resilience to environmental change<sup>7</sup>. Although the  
51 microbiota is a complex assemblage of bacteria, fungi, archaea, viruses and protozoa, the  
52 overwhelming majority of research published to date has focused solely on exploring interactions  
53 between the host and the bacterial component of its microbiome<sup>8,9</sup>. Despite fungal-bacterial  
54 interactions being relatively well documented in soils and plants<sup>10-13</sup>, relatively few studies have  
55 examined the dynamics of non-bacterial components of the microbiome in animal hosts (but see <sup>14-</sup>  
56 <sup>16</sup>), especially in non-model organisms or wild systems. As such, our current understanding of the  
57 strength of host-microbe interactions is likely skewed by a bacteria-centric view of the microbiome.

58         The roles of animal-associated mycobiomes are currently not well understood; however, a  
59 small but growing body of research has identified the potential importance of resident fungal  
60 microbiota, termed the 'mycobiome', for host animal health. This may include diverse functions such  
61 as fat, carbon and nitrogen metabolism<sup>17,18</sup>, degradation of cellulose and other carbohydrates<sup>19</sup>,  
62 pathogen resistance<sup>20</sup>, initiating immune pathways and regulating inflammatory responses<sup>9,21</sup>, and  
63 even host dispersal<sup>22</sup>. Host phylogeny has repeatedly been shown to be an important predictor of  
64 bacterial microbiome structure in multiple vertebrate clades, a phenomenon known as  
65 'phylosymbiosis'<sup>23-27</sup>. However, evidence of phylosymbiosis from other microbial kingdoms or  
66 domains is lacking and remains a major gap in our knowledge. Addressing this shortfall is vital as we  
67 likely underestimate the strength and importance of coevolution between animal hosts and their  
68 resident fungal communities. In addition, studying multiple microbial groups in concert will allow us to  
69 identify positive and negative covariances across microbial kingdoms in the abundance of taxonomic  
70 and/or functional groups that may reflect selection for interactions among microbes that are crucial  
71 determinants of animal health.

72         Here we used ITS and 16S rRNA amplicon sequencing to characterise fungal and bacterial  
73 communities of primarily gut and faecal samples from 49 host species across eight classes, including  
74 both vertebrates and invertebrates (Table 1). We predicted that both fungal and bacterial microbiomes

75 demonstrated strong signals of phyllosymbiosis across the broad host taxonomic range we test here.  
76 Specifically, we predicted that patterns of phyllosymbiosis within microbial kingdoms will also drive  
77 significant positive covariance in patterns of microbial community structure between microbial  
78 kingdoms within individual hosts, suggestive of evolutionary constraints that favour co-selection of  
79 specific bacterial and fungal communities in tandem. Additionally, we used network analysis to identify  
80 key bacteria-fungi interactions whilst quantifying variation in the frequency and strength of bacteria-  
81 fungi interaction networks across host taxonomic groups. Finally, we investigate the prediction that  
82 cross-kingdom phyllosymbiosis may be partially driven by similarity in host dietary niche across the 32  
83 bird and mammal species.

84

## 85 RESULTS

### 86 *Alpha-diversity*

87 Our data revealed consistent patterns in fungal and bacterial alpha-diversity across host taxonomic  
88 groups. Bacterial community alpha-diversity was generally greater than, or similar to, fungal  
89 community alpha-diversity at the host species level (Fig. 1A), although two species exhibited greater  
90 fungal diversity than bacterial (great tit, tsetse fly; Fig. 1A). Alpha-diversity measures remained  
91 relatively stable within a host species whether data were rarefied to 500, 1000, or 2500 reads (Figs. 1,  
92 S1, S2; Supplementary Material). Comparisons between microbial richness values within individuals  
93 (i.e. *relative* richness) using a binomial GLMM supported these patterns, indicating that bacterial  
94 richness was higher on average in 80% of cases [95% credible interval (CI) 0.55 - 0.95]. When  
95 conditioning on Class, samples from both Mammalia and Insecta were more likely to have higher  
96 bacterial diversity than fungal diversity (credible intervals not crossing zero on the link scale; Fig. 1B),  
97 though all classes had posterior mean values >0 (>50% on the probability scale). Indeed, Mammalia  
98 were more likely to have higher bacterial relative to fungal diversity than Aves in our study organisms  
99 (mean difference in probability 22.9% [1.6 - 45.7%]). Variation among species in this model explained  
100 19.5% [7.3 - 31.2%] of the variation in relative microbial richness. Using a bivariate model with both  
101 fungal and bacterial diversity as response variables to examine patterns of *absolute* microbial  
102 richness across host taxonomy, only Mammalia exhibited bacterial diversity that was consistently  
103 higher than fungal diversity when controlling for variation among species (mean difference in index

104 5.16; [3.33 - 6.96]; Fig. 1C). This model differs from the binomial version because it accounts for the  
105 magnitude of difference in microbial richness, rather than just relative richness. There was no  
106 evidence of positive covariance between fungal and bacterial richness values at the species level  
107 (mean correlation 0.3, 95% credible intervals -0.55 - 0.86), suggesting that high diversity of one  
108 microbial group does not necessarily reflect high diversity of the other. The bivariate model also  
109 revealed that species identity explained 33.9% [22.2 – 44.2%] of variation in bacterial diversity, and  
110 22.4% [9.8 – 35.5%] of variation in fungal diversity. Phylogenetic analyses supported these general  
111 patterns (Fig. S2). For fungi, we detected phylogenetic signal in patterns of both Inverse Simpson  
112 index ( $C_{\text{mean}} = 0.22$ ,  $p = 0.021$ ) and number of observed amplicon sequence variants (ASVs) ( $C_{\text{mean}} =$   
113  $0.26$ ,  $p = 0.016$ ). For bacteria, phylogenetic signal was evident for number of ASVs ( $C_{\text{mean}} = 0.28$ ,  $p =$   
114  $0.016$ ) but not inverse Simpson index ( $C_{\text{mean}} = 0.114$ ,  $p = 0.100$ ).

115

#### 116 *Beta-diversity*

117 The five most abundant classes of fungi across all host species were Dothideomycetes,  
118 Eurotiomycetes, Lecanoromycetes, Pezizomycetes and Sordariomycetes, for which Dothideomycetes  
119 and Eurotiomycetes showed the most variation between host species (Fig. S3). The five most  
120 abundant classes of bacteria were Actinobacteria, Alphaproteobacteria, Bacilli, Bacteroidia, and  
121 Gammaproteobacteria, which all varied considerably among host species (Fig. S3).

122 Both fungal and bacterial community composition at the phylum level varied considerably in  
123 concert with host class and order (Fig. 2A). However, notable trends include dominance of the fungal  
124 phylum Ascomycota in most species, with the exception of the two Perissodactyla (odd-toed ungulate)  
125 species, where most fungal ASVs belonged to the Neocallimastigomycota. Likewise, the bacterial  
126 phylum Firmicutes dominated most mammal species, but Proteobacteria were more common on  
127 average in birds and fish (Fig. 2A). Analysis of factors affecting bacterial and fungal community  
128 structure using PERMANOVA on centred-log ratio (CLR) transformed ASV abundances revealed  
129 significant phylogenetic effects of host class, order and species, as well as effects of sample storage  
130 and library preparation protocol (Table 2; Fig. S4). For both microbial kingdoms, host species identity  
131 explained more variation than host class or order, and this pattern remained when re-running the

132 models without sample preparation protocol effects, though this inflated the estimate of  $R^2$  for all  
133 taxonomic groupings (Table 2).

134

### 135 *Phylosymbiosis*

136 Consistent with our predictions, the similarity between the microbial communities of a given pair of  
137 host species was proportional to the phylogenetic distance between them (ASV level: fungal cor. =  
138 0.26;  $p = 0.001$ ; bacterial cor. = 0.37;  $p = 0.001$ ; Fig. 2B). Correlations for both bacterial and fungal  
139 communities became stronger when aggregating microbial taxonomy to family (Fig. 2B). Critically, the  
140 bacterial correlation was stronger than the fungal equivalent at both ASV (mean diff. 0.077 [0.053 -  
141 0.103]) and family (mean diff. 0.10 [0.082 - 0.13]) levels (Fig. 2B), indicating stronger patterns of  
142 phylosymbiosis for bacteria.

143 We detected a strong, significant correlation between fungal and bacterial community  
144 structure of individual samples at the level of ASVs using Procrustes rotation (cor. = 0.29,  $p < 0.001$ ;  
145 Fig. 2C). Collapsing ASV taxonomy to genus, family, and order resulted in even stronger correlations  
146 (cor. = 0.44, 0.48 & 0.43, respectively; all  $p < 0.001$ ; Fig. 2C). These data indicate a coupling between  
147 the structures of fungal and bacterial communities, whereby shifts in structure of one community  
148 across the phylogeny also reflect consistent shifts in the other microbial group.

149

### 150 *Network analysis*

151 Analysis of correlations among fungal and bacterial abundances revealed differences in network  
152 structure at both the host class (Fig. 3) and host species level (Figs. S5; S6). In particular, fungi of the  
153 phylum Ascomycota appeared frequently in the putative interaction networks of birds, mammals and  
154 amphibians (Fig. 3). There was also systematic variation in network structure among taxonomic  
155 groups. Using the class-level network data in Fig. 3, we detected that Mammalia exhibited the fewest  
156 components, fewest communities, and lowest modularity (Fig. 4A, Table S1), indicating lower overall  
157 network subdivision relative to other animal classes. Models of species-level network data (Fig. S5)  
158 revealed the frequency of positive co-occurrence between pairs of microbes also varied by class;  
159 Mammalia exhibited the highest proportion of positive edges (Fig. 4B), being significantly greater than

160 those of birds (mean diff. 0.042 [0.017-0.067]) and amphibians (mean diff. 0.05 [0.002-0.112]).  
161 Notably, invertebrates had a markedly lower proportion of positive edges compared to all other taxa  
162 (Fig. 4). Class explained 93.2% [92.9-93.4%] of variation in edge sign. There was also clear variation  
163 at the species level; for some host species, there were considerably more positive interactions (e.g.  
164 yellowhammers, pygmy shrews, greater white-toothed shrews, wood mouse, woodpigeon, yellow-  
165 necked mouse; Fig. S6). In some species, there were slightly more negative interactions than positive  
166 (e.g. blackcap, goldfinch; Fig. S5; S6).

167

### 168 *Dietary analysis*

169 While there was a significant correlation between host-associated bacterial community composition  
170 and dietary data for mammals ( $r = 0.334$ ,  $p = 0.002$ ), and a near-significant relationship between  
171 fungal community composition and diet ( $r = 0.142$ ,  $p = 0.067$ ), there was no significant relationship  
172 between dietary data and bacterial community composition ( $r = 0.087$ ,  $p = 0.211$ ) or fungal community  
173 composition ( $r = 0.026$ ,  $p = 0.386$ ) for birds. Further, taxonomic differences in microbiome composition  
174 based on differences in crude dietary patterns were not clear for either bacteria or fungi when the  
175 microbiome composition was visualised at the family level (Figs. S7, S8). That said,  
176 Alphaproteobacteria and Eurotiomycete fungi were notably absent from species that primarily ate  
177 vegetation (i.e. grasses etc) and Neocallimastigomycete fungi were the predominant fungal class  
178 associated with two out of four of these host species (Figs. S7, S8).

179

## 180 **DISCUSSION**

181 Our study represents the most wide-ranging evaluation of animal mycobiome composition, and its  
182 covariation with the bacterial microbiome, undertaken to date. Our data provide novel evidence for  
183 mycobiome phylosymbiosis in wild animals, indicative of close evolutionary coupling between hosts  
184 and their resident fungal communities. Consistent with previous studies, we also find evidence of  
185 phylosymbiosis in the bacterial microbiome<sup>28</sup>, but crucially, we demonstrate strong and consistent  
186 covariation between fungal and bacterial communities across host phylogeny, especially at higher  
187 microbial taxonomic levels. These patterns are supported by complementary network analysis

188 illustrating frequent correlative links between fungal and bacterial taxa, whereby certain pairs of  
189 microbes from different kingdoms are much more likely to co-occur in the microbiome than expected  
190 by chance. Taken together, these data provide novel evidence consistent with recruitment by animal  
191 hosts for specific fungal and bacterial communities, which in turn may reflect selection for interactions  
192 between bacteria and fungi critical for host physiology and health.

193 We found marked variation among host species in microbial community richness and  
194 composition for both bacteria and fungi. Complementary analyses using mixed models and  
195 phylogenetic models both detected a signal of host phylogeny in determining fungal and bacterial  
196 microbiome diversity. Though our data suggest many species support a diverse assemblage of host-  
197 associated fungi, critically we show that i) bacterial diversity tends to be higher on average relative to  
198 fungal diversity; and ii) there is no signal of positive covariance between fungal and bacterial richness  
199 within species, suggesting more ASV-rich bacterial microbiomes are not consistently associated with  
200 more ASV-rich mycobiomes. These patterns could arise because of competition for niche space  
201 within the gut, where high bacterial diversity may reflect stronger competition that prevents  
202 proliferation of fungal diversity. Fungi are enzymatically very active, and their crucial roles in  
203 degrading organic molecules and redistributing carbon and nitrogen in soil and plant ecosystems are  
204 well documented<sup>29,30</sup>. Understanding patterns of niche competition within and among microbial groups  
205 requires that we are able to define those niches by measuring microbial gene function, and  
206 quantifying degree of overlap or redundancy in functional genomic profiles across bacteria and fungi.

207 We detected strong phylosymbiosis for both fungi and bacteria across a broad host  
208 phylogeny encompassing both vertebrate and invertebrate classes. This pattern was significantly  
209 stronger in bacteria than for fungi. In both microbial kingdoms, the signal of phylosymbiosis  
210 strengthened when aggregating microbial taxonomic assignments to family level, a phenomenon that  
211 has previously been shown for bacterial communities<sup>31</sup>. That this pattern also occurs in fungi suggests  
212 either that host recruitment is weaker at finer-scale taxonomies, or our ability to detect that signal is  
213 weaker at the relatively noisy taxonomic scale of ASVs. Stronger signals of phylosymbiosis at family-  
214 level taxonomies may reflect the deep evolutionary relationships between hosts and their bacterial  
215 and fungal communities, as well as the propensity for microbial communities to allow closely related  
216 microbes to establish whilst repelling less related organisms<sup>32</sup>. That is, higher-order microbial  
217 taxonomy may better approximate functional guilds within the microbiome, such as the ability to



218 degrade cellulose<sup>25,31</sup>, which are otherwise obscured by taxonomic patterns of ASVs. Resolving this  
219 requires the integration of functional genomic data from the fungal and bacterial microbiota into the  
220 phylogeny.

221 In addition to microbe-specific patterns of phyllosymbiosis, a key novel finding of our work is  
222 that fungal and bacterial community composition correlate strongly across the host phylogeny. These  
223 patterns are consistent with host recruitment for particular suites of fungal and bacterial taxa, which  
224 may represent bacteria-fungi metabolic interactions beneficial to the host. Bacteria-fungi interactions  
225 have previously been demonstrated for a handful of host species<sup>8,9,17,33,34</sup>, but here we show these are  
226 widespread across multiple animal classes. Both bacteria and fungi have considerable enzymatic  
227 properties that facilitate the liberation of nutrients for use by other microbes, thus facilitating cross-  
228 kingdom colonisation<sup>35</sup> and promoting metabolic inter-dependencies<sup>36–38</sup>. These findings are  
229 supported by our network analyses, which identified numerous putative interactions between bacteria  
230 and fungi for many of our host species. Critically, the frequency and predicted direction of these  
231 relationships varied considerably among host classes, with the mammalian network exhibiting i) a  
232 lower modularity, indicating weaker clustering into fewer discrete units (both distinct components and  
233 interlinked communities); and ii) a higher frequency of positive correlations between microbes  
234 compared to most other classes, in particular birds and insects. Comparisons of networks are  
235 challenging when they differ in size (i.e. number of nodes) and structure, and differences between  
236 classes in traits like modularity will also be affected by species replication within each class. However,  
237 proportional traits like interaction structure (proportion of positive interactions) are unlikely to be driven  
238 solely by sample size, suggesting marked biological variation in strength of fungi-bacteria interactions  
239 across the host phylogeny. These putative interaction networks provide novel candidates for further  
240 investigation in controlled systems, where microbiome composition and therefore the interactions  
241 among microbes can be manipulated to test the influence of such interactions on host physiology.

242 The drivers of phyllosymbiosis remain unclear, even for bacterial communities; is it a  
243 phylogenetic signal indicative of host-microbiome coevolution, or simply a product of “ecological  
244 filtering” of the microbiome in the host organism either via extrinsic (e.g. diet, habitat) or intrinsic  
245 sources (e.g. gut pH, immune system function)<sup>26,28,39</sup>? Our results indicate host diet may play a role in  
246 determining overall fungal community composition, although the relationship is weak and only evident  
247 for bacteria in mammals. These results are broadly consistent with previous work, where the influence

248 of diet on bacterial microbiome was most evident in mammals<sup>25</sup>. However, Li et al.<sup>15</sup> showed that the  
249 composition and diversity of both fungal and bacterial communities of faecal samples differed  
250 between phytophagous and insectivorous bats, and Heisel et al.<sup>17</sup> demonstrated changes in fungal  
251 community composition in mice fed a high fat diet. Our study was not designed to test for the effects  
252 of ecological variation in diet on fungal microbiome *within* a species. Nor can we discount the  
253 possibility that at finer taxonomic scales within classes, signals of the effect of *among* species  
254 variation in diet on mycobiome become stronger (e.g. <sup>15</sup>). Although diet is thought to be a predominant  
255 driver of bacterial microbiome composition in host organisms<sup>25,40</sup>, there is also evidence that the  
256 signals produced from faecal and true gut samples differ; that is, data generated from faecal samples  
257 indicate diet is the predominant driver of “gut” microbiome composition, whereas data from  
258 gastrointestinal samples indicate host species is the predominant determinant<sup>41</sup>. Moreover, faecal  
259 samples may only represent a small proportion of the gastrointestinal microbiome<sup>41–43</sup>. Our data also  
260 show that sample type has a significant effect on both fungal and bacterial community composition  
261 (as well as DNA extraction method and storage method; see <sup>44–47</sup> for other examples of this). As such,  
262 a more thorough analysis of true gut communities is required to determine the extent to which  
263 mycobiome phylosymbiosis occurs across host taxa, and what other ecological and host-associated  
264 factors influence mycobiome composition and function.

265         These data provide strong evidence that both fungal symbionts and fungi-bacteria  
266 interactions are likely to be critical for host functioning and health. Within animals, the roles of host-  
267 associated fungal communities are less well understood, yet these data highlight that fungi are  
268 important components of microbiome structure that are often overlooked. Key priorities for future work  
269 are to i) understand the range of functions provided by the host mycobiome, and how these alter or  
270 complement those provided by the bacterial microbiome; and ii) characterise the functional  
271 interactions between bacteria and fungi and how they influence key host metabolic processes and life  
272 history.

273

## 274 **METHODS**

275 *Sample collection*

276 DNA was extracted from tissue or faecal samples of 49 host species using a variety of DNA extraction  
277 methods (Table 1) and normalised to ~10 ng/ul. Samples were largely collated from previous studies  
278 and/or those available from numerous researchers and as such, DNA extraction and storage  
279 techniques were not standardised across species. We sequenced a median of 10 samples per  
280 species (range of 5 to 12; Table 1).

281

### 282 *ITS1F-2 and 16S rRNA amplicon sequencing and pre-processing*

283 To identify fungal communities, we amplified DNA for the ITS1F-2 rRNA gene using single index  
284 reverse primers and a modified protocol of Smith & Peay<sup>48</sup> and Nguyen et al.<sup>49</sup>, as detailed in Griffiths  
285 et al.<sup>13</sup> (see supplementary material for additional information). To identify bacterial communities, we  
286 amplified DNA for the 16S rRNA V4 region using dual indexed forward and reverse primers according  
287 to Kozich et al.<sup>50</sup> and Griffiths et al.<sup>51</sup> (see supplementary material for additional information). We  
288 sequenced normalised libraries using paired-end reads (2 x 250bp) with Illumina v2 chemistry on the  
289 MiSeq platform at the University of Salford. We ran the ITS rRNA library twice to increase sequencing  
290 depth, and combined data within samples across these two runs in the data pre-processing stage.

291 We conducted all data processing and analysis in RStudio v1.2.1335 for R<sup>52,53</sup> (see  
292 supplementary files for full code). We conducted amplicon sequence processing in DADA2 v1.5<sup>54</sup> for  
293 both ITS rRNA and 16S rRNA amplicon data (see supplementary material for additional information).  
294 After data processing, we obtained a median of 1425 reads per sample (range of 153 to 424,527) for  
295 ITS rRNA libraries, and a median of 3273 reads per sample (range of 153 to 425,179) for 16S rRNA  
296 libraries.

297

### 298 *Host Phylogenetic Distances*

299 As many of our host species lack genomic resources from which to construct a genome-based  
300 phylogeny, we built a dated phylogeny of host species using TimeTree<sup>55</sup>. The phylogenetic tree  
301 contained 42 species, of which 36 were directly represented in the TimeTree database. A further six  
302 species had no direct match in TimeTree and so we used a congener as a substitute (*Amitia*,  
303 *Glossina*, *Portunus*, *Ircinia*, *Amblyomma*, *Cinachyrella*). We calculated patristic distance among

304 species based on shared branch length in the phylogeny using the ‘cophenetic’ function in the *ape*  
305 package<sup>56</sup> in R. We visualised and annotated the phylogeny using the R package *ggtree*<sup>57</sup>. To create  
306 a phylogeny for all samples, we grafted sample-level tips onto the species phylogeny with negligible  
307 branch lengths following Youngblut et al.<sup>25</sup>.

308

### 309 *Fungal and bacterial community analysis*

310 We used the R package *brms*<sup>58,59</sup> to fit the following (generalized) linear mixed effects models  
311 [(G)LMMs]. For higher order taxonomic predictors and random effects, we binned all invertebrate  
312 classes into a single grouping to improve model performance, as otherwise invertebrate class and  
313 species were co-linear. All vertebrate taxonomic groupings were equivalent to class (Mammalia, Aves  
314 etc). To compare alpha-diversity between species and microbial kingdoms, we rarefied libraries to  
315 500 reads per sample, yielding 292 samples from 46 species and 307 samples from 47 species for  
316 fungal and bacterial kingdoms respectively. Alpha-diversity measures remained relatively stable within  
317 a host species whether data were rarefied to 500, 1000, or 2500 reads, with similar patterns exhibited  
318 between the two kingdoms (Figs. 1, S1, S2; see Supplementary Material for more details). To  
319 visualise differences between microbial richness within species, we filtered the data to species with at  
320 least two samples per microbial kingdom, giving a total of 41 species from six classes. For model  
321 fitting, we filtered the data to only those samples with paired metrics of microbial richness for both  
322 kingdoms (201 observations from 42 species). We fitted two models to these data. First, to quantify  
323 relative differences in richness between bacteria and fungi within a sample, we used GLMMs in the  
324 *brms* package, with i) Bernoulli errors and a logit link; ii) a binary response of ‘1’ if bacterial richness  
325 was higher than fungal richness, and ‘0’ otherwise; and iii) ‘Species’ nested within ‘Class’ as random  
326 intercepts. We did not include intermediate levels of taxonomy because replication at Order and  
327 Family levels was low relative to Class. We did not use a phylogenetic mixed model as not all species  
328 were represented in the TimeTree phylogeny. Second, to quantify absolute differences in microbial  
329 richness, we fitted a bivariate response LMM with both fungal and bacterial richness values as a two-  
330 column response with Class as a fixed effect, and Species as a random intercept. For all models, we  
331 used uninformative Cauchy priors for the random effects and Gaussian priors for fixed effects  
332 coefficients. We assessed model adequacy using visual inspection of chains to assess mixing and

333 stationarity properties, as well as posterior predictive checks using the 'pp\_check' function in *brms*.  
334 We calculated  $r^2$  of models using the 'bayes\_R2' function. We assessed the importance of terms  
335 based on whether 95% credible intervals of the parameter estimates of interest crossed zero. We  
336 used *ggplot*<sup>60</sup>, *cowplot*<sup>61</sup> and *tidybayes*<sup>62</sup> for raw data and model estimate plotting. To support these  
337 analyses, we also used the R packages *phylobase*<sup>63</sup> and *phylosigna*<sup>64</sup> to estimate the phylogenetic  
338 signal in patterns of alpha diversity for both bacteria and fungi, using both Inverse Simpson Index and  
339 number of observed ASVs as outcome variables. We calculated Abouheif's  $C_{\text{mean}}$  for each diversity-  
340 microbe combination and corrected p values for multiple testing using Benjamini-Hochberg correction.

341 To identify taxonomic differences in microbiome and mycobiome composition between host  
342 species, we used centred-log-ratio (CLR) transformation in the *microbiome*<sup>65</sup> package to normalise  
343 microbial abundance data, which obviates the need to lose data through rarefying<sup>66</sup>. To visualise  
344 differences in microbial community structure among samples, we i) plotted proportional abundance of  
345 microbial groups at the phylum level, aligned to the host phylogenetic tree, ii) agglomerated the data  
346 to class level and visualised the variation in CLR-transformed ratios for the five most abundant  
347 microbial classes in each kingdom for each species using jitter plots, and iii) conducted principal  
348 components analysis (PCA) using CLR-transformed abundance matrices for each kingdom. To  
349 quantify differences in beta-diversity among kingdoms and species whilst simultaneously accounting  
350 for sample storage and library preparation differences among samples, we conducted a  
351 PERMANOVA analysis on among-sample Euclidean distances of CLR-transformed abundances  
352 using the *adonis* function in *vegan*<sup>67</sup> with 999 permutations. For both kingdoms, we specified effects in  
353 the following order: sample type, tissue storage, extraction kit, Class, Order, Species. This  
354 marginalises the effects of sample metadata variables first, before partitioning the remaining variance  
355 into that accounted for by host phylogeny. The results were similar when amplicon data were  
356 converted to relative abundance or rarefied to 500 reads (data not presented).

357 To test the hypothesis that inter-individual differences in microbial community composition  
358 were preserved between microbial kingdoms, we performed Procrustes rotation of the two PCA  
359 ordinations for bacterial and fungal abundance matrices, respectively (n = 277 paired samples from  
360 46 species). We also repeated this analysis with ASVs agglomerated into progressively higher  
361 taxonomic rankings from genus to order (see <sup>31</sup>). To provide a formal test of differences in strength of  
362 correlation at different taxonomic levels, we conducted a bootstrap resampling analysis where for

363 each kingdom at each iteration, we randomly sampled 90% of the data and recalculated the  
364 correlation metric. We repeated this process 999 times to build a distribution of correlation values at  
365 each taxonomic grouping.

366 To examine the hypothesis that inter-individual distance in microbial community composition  
367 varies in concert with inter-host phylogenetic distance, we performed a Procrustes rotation on the  
368 paired matrix of microbial distance (Euclidean distance of CLR-transformed abundances) and patristic  
369 distance from the phylogenetic tree. We also repeated the analysis but binning the microbial data to  
370 family level. As above, we conducted a bootstrap resampling procedure, selecting 90% of the data at  
371 random and recalculating the correlation, for a total of 1000 permutations. This allowed us to test for  
372 significant differences in strength of correlation *within* kingdoms across taxonomic grouping levels,  
373 and *across* kingdoms within a particular taxonomic grouping.

374 To determine the effect of diet on bacterial and fungal community composition, we used only  
375 samples from the bird and mammal species and agglomerated the data for each host species using  
376 the `merge_samples` function in *phyloseq*<sup>68</sup>. This gave us an representative microbiome for each host  
377 species, which we rarefied to the lowest number of reads for each combination of kingdom and host  
378 taxon (2,916 – 9,160 reads; bacterial read counts were low for lesser horseshoe bats and so this  
379 species was removed from this analysis) and extracted Euclidean distance matrices for each. We  
380 then correlated these with dietary data obtained from the EltonTraits database<sup>69</sup> using Mantel tests  
381 with Kendall rank correlations in the *vegan* package<sup>67</sup>. We agglomerated the microbial data to class  
382 level and visualised the bacterial and fungal community compositions for mammals alongside pie  
383 charts displaying EltonTrait dietary data for each species.

384 To identify potential relationships between fungal and bacterial communities, we conducted  
385 two analyses; 1) We used the R package *SpiecEasi*<sup>70</sup> to identify correlations between unrarefied,  
386 CLR-transformed ASVs abundances at the host class level (with Invertebrates grouped), and 2) we  
387 used co-occurrence analysis at the species level, by rarefying the bacterial and fungal data sets to  
388 500 reads each, and agglomerated these to family level, resulting in 117 bacterial groups and 110  
389 fungal groups. We then merged the *phyloseq* objects for bacterial and fungal communities for each  
390 sample, with sufficient data retained to conduct the co-occurrence analysis for 40 host species. Using  
391 these cross-kingdom data, we calculated the co-occurrence between each pair of microbial genera by

392 constructing a Spearman's correlation coefficient matrix in the *bioDist* package<sup>71,72</sup>. We visualised  
393 those with  $\rho > 0.50$  (strong positive interactions) and  $\rho < -0.50$  (strong negative interactions) for  
394 each host species separately using network plots produced in *igraph*<sup>73</sup>. We calculated modularity of  
395 the class-level microbial networks comprising both positive and negative interactions using the  
396 modularity() function after greedy clustering implemented in the *igraph* package. We resampled 90%  
397 of nodes in each network 1000 times to build distributions of modularity with which to quantify  
398 differences among animal classes. We used binomial GLM to test the hypothesis that the proportion  
399 of positive edges (correlations) varies by host class.

400

## 401 **ACKNOWLEDGEMENTS**

402 We would like to thank Miran Aprahamian and Chris Williams (Environment Agency) for providing  
403 samples, as well as BEI Resources, the US Forest Service and the University of Wisconsin-Madison  
404 for providing mock communities. We are grateful to Devenish Nutrition for funding the red deer  
405 research at Dowth Hall, Co. Meath, Ireland. The sampling of shrews was funded by a Heredity  
406 Fieldwork Grant awarded by the Genetics Society. The collection of dove and pigeon faecal samples  
407 was jointly funded by the Royal Society for the Protection of Birds and Natural England through the  
408 Action for Birds in England (AfBiE) partnership. Fieldwork enabling collection of avian faecal samples  
409 from Lincolnshire was funded by The Royal Society Research Grant RG170086 to JCD. Small  
410 mammal sampling in the Chernobyl Exclusion Zone was supported by the TREE  
411 (<https://tree.ceh.ac.uk/>) and RED FIRE (<https://www.ceh.ac.uk/redfire>) projects. TREE was funded by  
412 the Natural Environment Research Council (NERC), Radioactive Waste Management Ltd. and the  
413 Environment Agency as part of the RATE Programme; RED FIRE was a NERC Urgency Grant.  
414 Northern muriqui research at Caparaó National Park, Brazil, was funded by CAPES (BEX 1298/15-1).

415

## 416 **DATA ACCESSIBILITY STATEMENT**

417 Sequence data are deposited in the NCBI SRA database under BioProject numbers PRJNA593927  
418 and PRJNA593220. Full analysis code has been provided as supplementary material.

419

420 **REFERENCES**

- 421 1. Archie, E. A. & Tung, J. Social behavior and the microbiome. *Curr. Opin. Behav. Sci.* **6**, 28–34  
422 (2015).
- 423 2. McFall-Ngai, M. *et al.* Animals in a bacterial world, a new imperative for the life sciences. *Proc.*  
424 *Natl. Acad. Sci. U. S. A.* **110**, 3229–3236 (2013).
- 425 3. Bahrndorff, S., Bahrndorff, S., Alemu, T., Alemneh, T. & Nielsen, J. L. The Microbiome of  
426 Animals : Implications for Conservation Biology. *Int. J. Genomics* **2016**, 5304028 (2016).
- 427 4. Dillon, R. J., Vennard, C. T., Buckling, A. & Charnley, A. K. Diversity of locust gut bacteria  
428 protects against pathogen invasion. *Ecol. Lett.* **8**, 1291–1298 (2005).
- 429 5. Bates, K. A. *et al.* Amphibian chytridiomycosis outbreak dynamics are linked with host skin  
430 bacterial community structure. *Nat. Commun.* **9**, 1–11 (2018).
- 431 6. Walsh, B. S., Heys, C. & Lewis, Z. Gut microbiota influences female choice and fecundity in  
432 the nuptial gift-giving species, *Drosophila subobscura* (Diptera: Drosophilidae). *Eur. J.*  
433 *Entomol.* **114**, 439–445 (2017).
- 434 7. Apprill, A. Marine animal microbiomes: Toward understanding host-microbiome interactions in  
435 a changing ocean. *Front. Mar. Sci.* **4**, 1–9 (2017).
- 436 8. Sam, Q. H., Chang, M. W. & Chai, L. Y. A. The fungal mycobiome and its interaction with gut  
437 bacteria in the host. *Int. J. Mol. Sci.* **18**, 330 (2017).
- 438 9. Enaud, R. *et al.* The Mycobiome: A Neglected Component in the Microbiota-Gut-Brain Axis.  
439 *Microorganisms* **6**, 22 (2018).
- 440 10. Frey-Klett, P. *et al.* Bacterial-Fungal Interactions: Hyphens between Agricultural, Clinical,  
441 Environmental, and Food Microbiologists. *Microbiol. Mol. Biol. Rev.* **75**, 583–609 (2011).
- 442 11. Jakuschkin, B. *et al.* Deciphering the Pathobiome: Intra- and Interkingdom Interactions  
443 Involving the Pathogen *Erysiphe alphitoides*. *Microb. Ecol.* **72**, 870–880 (2016).
- 444 12. van Overbeek, L. S. & Saikkonen, K. Impact of Bacterial-Fungal Interactions on the  
445 Colonization of the Endosphere. *Trends Plant Sci.* **21**, 230–242 (2016).



- 446 13. Griffiths, S. M. *et al.* Complex associations between cross-kingdom microbial endophytes and  
447 host genotype in ash dieback disease dynamics. *J. Ecol.* 1–19 (2019). doi:10.1111/1365-  
448 2745.13302
- 449 14. Ghannoum, M. A. *et al.* Characterization of the oral fungal microbiome (mycobiome) in healthy  
450 individuals. *PLoS Pathog.* **6**, (2010).
- 451 15. Li, J. *et al.* Fecal Bacteriome and Mycobiome in Bats with Diverse Diets in South China. *Curr.*  
452 *Microbiol.* **75**, 1352–1361 (2018).
- 453 16. Liggenstoffer, A. S., Youssef, N. H., Couger, M. B. & Elshahed, M. S. Phylogenetic diversity  
454 and community structure of anaerobic gut fungi (phylum Neocallimastigomycota) in ruminant  
455 and non-ruminant herbivores. *ISME J.* **4**, 1225–1235 (2010).
- 456 17. Heisel, T. *et al.* High-Fat Diet Changes Fungal Microbiomes and Interkingdom Relationships in  
457 the Murine Gut. *mSphere* **2**, 1–14 (2017).
- 458 18. Wegley, L., Edwards, R., Rodriguez-Brito, B., Liu, H. & Rohwer, F. Metagenomic analysis of  
459 the microbial community associated with the coral *Porites astreoides*. *Environ. Microbiol.* **9**,  
460 2707–2719 (2007).
- 461 19. Yang, S. *et al.* Metagenomic Analysis of Bacteria, Fungi, Bacteriophages, and Helminths in the  
462 Gut of Giant Pandas. *Front. Microbiol.* **9**, 1–16 (2018).
- 463 20. Kearns, P. J. *et al.* Fight fungi with fungi: Antifungal properties of the amphibian mycobiome.  
464 *Front. Microbiol.* **8**, 1–12 (2017).
- 465 21. Yeung, F. *et al.* Altered Immunity of Laboratory Mice in the Natural Environment Is Associated  
466 with Fungal Colonization. *Cell Host Microbe* 1–14 (2020). doi:10.1016/j.chom.2020.02.015
- 467 22. Lu, M., Wingfield, M. J., Gillette, N. E., Mori, S. R. & Sun, J. H. Complex interactions among  
468 host pines and fungi vectored by an invasive bark beetle. *New Phytol.* **187**, 859–866 (2010).
- 469 23. Davenport, E. R. *et al.* The human microbiome in evolution. *BMC Biol.* **15**, 1–12 (2017).
- 470 24. Knowles, S. C. L., Eccles, R. M. & Baltrūnaitė, L. Species identity dominates over environment  
471 in shaping the microbiota of small mammals. *Ecol. Lett.* **22**, 826–837 (2019).
- 472 25. Youngblut, N. D. *et al.* Host diet and evolutionary history explain different aspects of gut

- 473 microbiome diversity among vertebrate clades. *Nat. Commun.* **10**, 1–15 (2019).
- 474 26. Amato, K. R. *et al.* Evolutionary trends in host physiology outweigh dietary niche in structuring  
475 primate gut microbiomes. *ISME J.* **13**, 576–587 (2019).
- 476 27. Song, S. J. *et al.* Comparative Analyses of Vertebrate Gut Microbiomes Reveal Convergence  
477 between Birds and Bats. *MBio* **11**, 1–14 (2020).
- 478 28. Brooks, A. W., Kohl, K. D., Brucker, R. M., van Opstal, E. J. & Bordenstein, S. R.  
479 Phylosymbiosis: Relationships and Functional Effects of Microbial Communities across Host  
480 Evolutionary History. *PLoS Biol.* **14**, 1–29 (2016).
- 481 29. Peay, K. G., Kennedy, P. G. & Bruns, T. D. Fungal Community Ecology: A Hybrid Beast with a  
482 Molecular Master. *Bioscience* **58**, 799–810 (2008).
- 483 30. Fierer, N. Embracing the unknown: Disentangling the complexities of the soil microbiome. *Nat.*  
484 *Rev. Microbiol.* **15**, 579–590 (2017).
- 485 31. Rausch, P. *et al.* Comparative analysis of amplicon and metagenomic sequencing methods  
486 reveals key features in the evolution of animal metaorganisms. *Microbiome* **7**, 1–19 (2019).
- 487 32. Stecher, B. *et al.* Like will to like: Abundances of closely related species can predict  
488 susceptibility to intestinal colonization by pathogenic and commensal bacteria. *PLoS Pathog.*  
489 **6**, e1000711 (2010).
- 490 33. Mcfrederick, Q. S., Mueller, U. G. & James, R. R. Interactions between fungi and bacteria  
491 influence microbial community structure in the Megachile rotundata larval gut Interactions  
492 between fungi and bacteria influence microbial community structure in the Megachile  
493 rotundata larval gut. *Proc. R. Soc. B Biol. Sci.* **281**, 20132653 (2014).
- 494 34. Forbes, J. D., Bernstein, C. N., Tremlett, H., Van Domselaar, G. & Knox, N. C. A fungal world:  
495 Could the gut mycobiome be involved in neurological disease? *Front. Microbiol.* **10**, 1–13  
496 (2019).
- 497 35. Pareek, S. *et al.* Comparison of Japanese and Indian intestinal microbiota shows diet-  
498 dependent interaction between bacteria and fungi. *npj Biofilms Microbiomes* **5**, (2019).
- 499 36. Hoffmann, C. *et al.* Archaea and Fungi of the Human Gut Microbiome: Correlations with Diet

- 500 and Bacterial Residents. *PLoS One* **8**, e66019 (2013).
- 501 37. Kim, W., Levy, S. B. & Foster, K. R. Rapid radiation in bacteria leads to a division of labour.  
502 *Nat. Commun.* **7**, 10508 (2016).
- 503 38. Rakoff-Nahoum, S., Foster, K. R. & Comstock, L. E. The evolution of cooperation within the  
504 gut microbiota. *Nature* **533**, 255–259 (2016).
- 505 39. Mazel, F. *et al.* Is Host Filtering the Main Driver of Phyllosymbiosis across the Tree of Life?  
506 *mSystems* **3**, 1–15 (2018).
- 507 40. Muegge, B. D. *et al.* Diet drives convergence in gut microbiome functions across mammalian  
508 phylogeny and within humans. *Science (80-. )*. **332**, 970–974 (2008).
- 509 41. Ingala, M. R. *et al.* Comparing microbiome sampling methods in a wild mammal: Fecal and  
510 intestinal samples record different signals of host ecology, evolution. *Front. Microbiol.* **9**, 1–13  
511 (2018).
- 512 42. Videvall, E., Strandh, M., Engelbrecht, A., Cloete, S. & Cornwallis, C. K. Measuring the gut  
513 microbiome in birds: Comparison of faecal and cloacal sampling. *Mol. Ecol. Resour.* **18**, 424–  
514 434 (2018).
- 515 43. Leite, G. *et al.* Sa1911 – Analysis of the Small Intestinal Microbiome Reveals Marked  
516 Differences from Stool Microbiome in a Large Scale Human Cohort: Redefining the “Gut  
517 Microbiome”. *Gastroenterology* **156**, S-449-S-450 (2019).
- 518 44. Yuan, S., Cohen, D. B., Ravel, J., Abdo, Z. & Forney, L. J. Evaluation of methods for the  
519 extraction and purification of DNA from the human microbiome. *PLoS One* **7**, (2012).
- 520 45. Weber, L., DeForce, E. & Apprill, A. Optimization of DNA extraction for advancing coral  
521 microbiota investigations. *Microbiome* **5**, 1–14 (2017).
- 522 46. Zhou, X., Nanayakkara, S., Gao, J. L., Nguyen, K. A. & Adler, C. J. Storage media and not  
523 extraction method has the biggest impact on recovery of bacteria from the oral microbiome.  
524 *Sci. Rep.* **9**, 1–10 (2019).
- 525 47. Asangba, A. E. *et al.* Variations in the microbiome due to storage preservatives are not large  
526 enough to obscure variations due to factors such as host population, host species, body site,

- 527 and captivity. *Am. J. Primatol.* **81**, 1–12 (2019).
- 528 48. Smith, D. P. & Peay, K. G. Sequence depth, not PCR replication, improves ecological  
529 inference from next generation DNA sequencing. *PLoS One* **9**, e90234 (2014).
- 530 49. Nguyen, N. H., Smith, D., Peay, K. & Kennedy, P. Parsing ecological signal from noise in next  
531 generation amplicon sequencing. (2014).
- 532 50. Kozich, J. J., Westcott, S. L., Baxter, N. T., Highlander, S. K. & Schloss, P. D. Development of  
533 a dual-index sequencing strategy and curation pipeline for analyzing amplicon sequence data  
534 on the miseq illumina sequencing platform. *Appl. Environ. Microbiol.* **79**, 5112–5120 (2013).
- 535 51. Griffiths, S. M. *et al.* Genetic variability and ontogeny predict microbiome structure in a  
536 disease-challenged montane amphibian. *ISME J.* **1** (2018). doi:10.1038/s41396-018-0167-0
- 537 52. RStudio Team. RStudio: Integrated Development for R. RStudio, Inc., Boston, MA URL  
538 <http://www.rstudio.c> (2016).
- 539 53. R Core Team. R: A language and environment for statistical computing. R Foundation for  
540 Statistical Computing. Vienna, Austria. URL <https://www.R-project.org/>. (2017).
- 541 54. Callahan, B. J. *et al.* DADA2: High-resolution sample inference from Illumina amplicon data.  
542 *Nat. Methods* **13**, 581–583 (2016).
- 543 55. Kumar, S., Stecher, G., Suleski, M. & Hedges, S. B. TimeTree: A Resource for Timelines,  
544 Timetrees, and Divergence Times. *Mol. Biol. Evol.* **34**, 1812–1819 (2017).
- 545 56. Paradis, E. & Schliep, K. Ape 5.0: An environment for modern phylogenetics and evolutionary  
546 analyses in R. *Bioinformatics* **35**, 526–528 (2019).
- 547 57. Yu, G., Smith, D. K., Zhu, H., Guan, Y. & Lam, T. T. Y. Ggtree: an R Package for Visualization  
548 and Annotation of Phylogenetic Trees With Their Covariates and Other Associated Data.  
549 *Methods Ecol. Evol.* **8**, 28–36 (2017).
- 550 58. Bürkner, P. C. Advanced Bayesian multilevel modeling with the R package brms. *R J.* **10**,  
551 395–411 (2018).
- 552 59. Bürkner, P. C. brms: An R package for Bayesian multilevel models using Stan. *J. Stat. Softw.*  
553 **80**, (2017).

- 554 60. Wickham, H. *ggplot2: Elegant Graphics for Data Analysis*. (Springer-Verlag New York, 2009).
- 555 61. Wilke, C. O. cowplot: Streamlined Plot Theme and Plot Annotations for 'ggplot2'. R package  
556 version 1.0.0. <https://CRAN.R-project.org/package=cowplot>. (2019).
- 557 62. Kay, M. tidybayes: Tidy Data and Geoms for Bayesian Models. R package version 2.0.3,  
558 <http://mjskay.github.io/tidybayes/>. (2020).
- 559 63. R Hackathon. phylobase: Base Package for Phylogenetic Structures and Comparative Data. R  
560 package version 0.8.10. <https://CRAN.R-project.org/package=phylobase> (2020).
- 561 64. Keck, F., Rimet, F., Bouchez, A. & Franc, A. phylsignal: an R package to measure, test, and  
562 explore the phylogenetic signal. *Ecol. Evol.* **6**, 2774–2780 (2016).
- 563 65. Lahti, L. & Shetty, S. Tools for microbiome analysis in R. Microbiome package version  
564 1.1.10013. <http://microbiome.github.com/microbiome>. (2017).
- 565 66. Gloor, G. B., Macklaim, J. M., Pawlowsky-Glahn, V. & Egozcue, J. J. Microbiome datasets are  
566 compositional: And this is not optional. *Front. Microbiol.* **8**, 1–6 (2017).
- 567 67. Oksanen, J. *et al.* vegan: Community Ecology Package. (2018).
- 568 68. McMurdie, P. J. & Holmes, S. Phyloseq: An R Package for Reproducible Interactive Analysis  
569 and Graphics of Microbiome Census Data. *PLoS One* **8**, e61217 (2013).
- 570 69. Wilman, H. *et al.* EltonTraits 1.0 : Species-level foraging attributes of the world's birds and  
571 mammals. *Ecology* **95**, 2027 (2014).
- 572 70. Kurtz, Z. D. *et al.* Sparse and Compositionally Robust Inference of Microbial Ecological  
573 Networks. *PLoS Comput. Biol.* **11**, 1–25 (2015).
- 574 71. Williams, R. J., Howe, A. & Hofmockel, K. S. Demonstrating microbial co-occurrence pattern  
575 analyses within and between ecosystems. *Front. Microbiol.* **5**, 1–10 (2014).
- 576 72. Ding, B., Gentleman, R. & Carey, V. bioDist: Different distance measures. R package version  
577 1.54.0. (2018).
- 578 73. Csárdi, G. & Nepusz, T. The igraph software package for complex network research.  
579 *InterJournal Complex Syst.* **1695**, 1695 (2006).

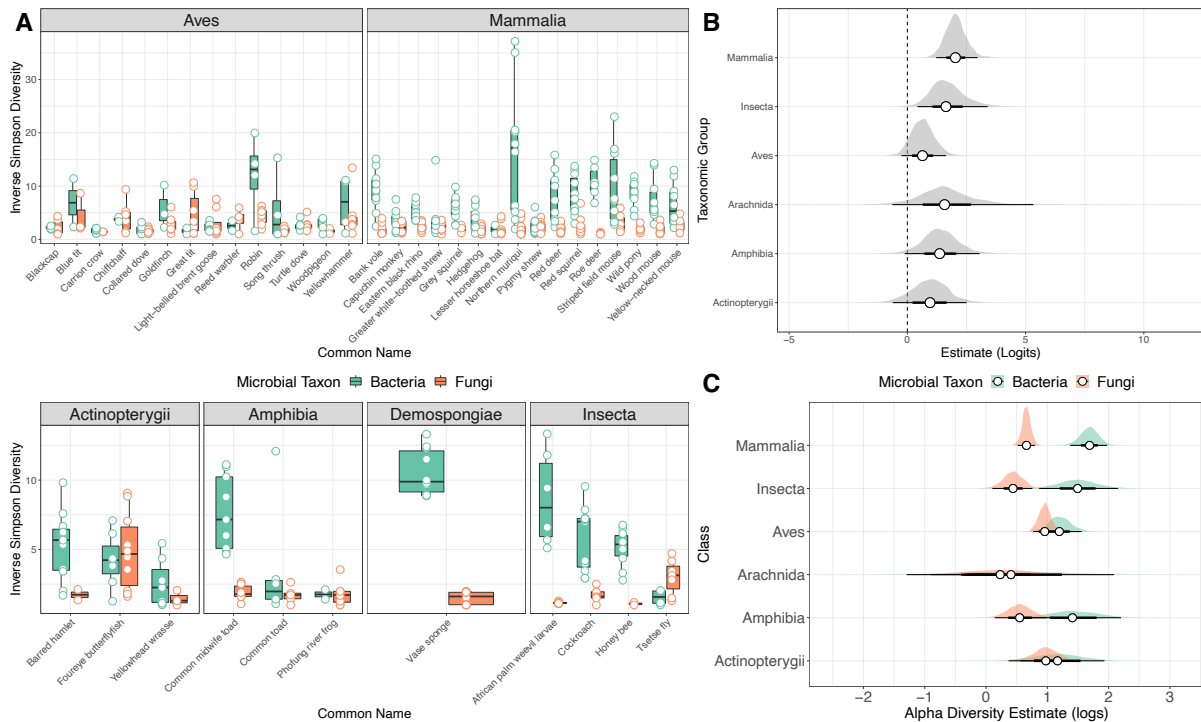

580

581 **FIGURE 1**

582 **(A)** Boxplots and raw data (points) of inverse Simpson indices for bacterial (green) and fungal  
 583 (orange) communities across a range of host species. **(B)** Posterior estimates of a binomial mixed  
 584 effects model investigating the influence of host taxonomy on the probability of a host's bacterial  
 585 diversity being higher than its fungal diversity. Mammalia and Insecta had posterior estimates  
 586 consistent with a >50% probability of an average animal sample having higher bacterial  
 587 (credible intervals do not cross zero on the link (logit) scale, equivalent to 50% on the probability  
 588 scale; vertical dashed line). **(C)** Posterior estimates of a bivariate mixed effects model examining  
 589 variation in average Inverse Simpson index of bacteria (green) and fungi (orange) across animal taxa.  
 590 Estimates are in logs. Points are posterior means, and error bars show 66% and 95% credible  
 591 intervals.

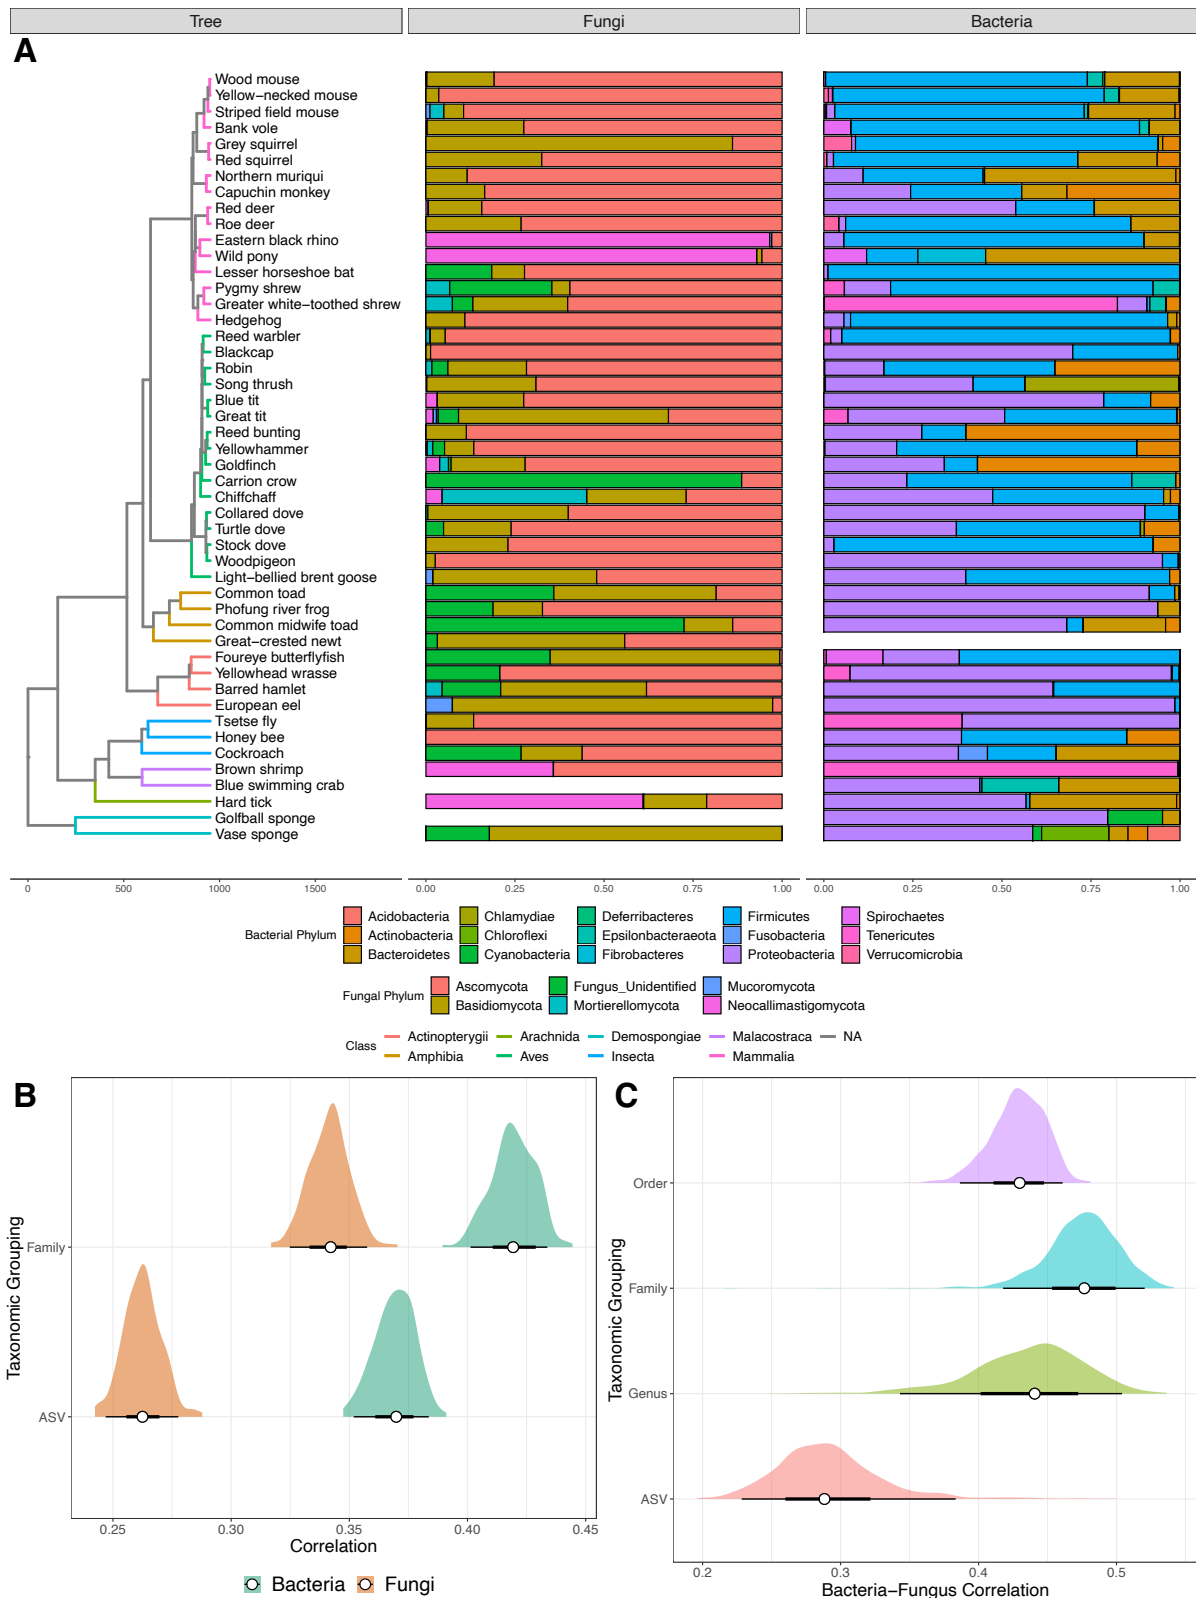

592

593 **FIGURE 2**

594 **(A)** Phylogenetic tree of host species, with branches coloured by class and node points coloured by

595 order. Barplots show proportional composition of fungal and bacterial phyla for each host species,

596 aligned to tree tips. **(B)** Correlation of fungal and bacterial community structures (inter-sample  
597 distance) derived from Procrustes rotation on principal component ordinations of each microbial  
598 group. Microbial communities were aggregated at various taxonomic groupings (order, family, genus),  
599 or as raw Amplicon Sequence Variant (ASV) taxonomy **(C)** Correlation between matrices of inter-  
600 sample distance of microbial communities and host genetic distances generated from the  
601 phylogenetic tree in A for both bacteria (green) and fungi (orange). As for B, microbial taxonomy was  
602 either raw ASVs or grouped into family level. Aggregation to family resulted in higher correlations for  
603 both microbial groups, and the correlation was always stronger in bacteria. For both B and C,  
604 distributions of correlation values were generated using resampling of 90% of available samples for  
605 that microbial group. Empty bars mean samples were not available for a particular species and so  
606 would not have been included in the calculations in panel B.



607

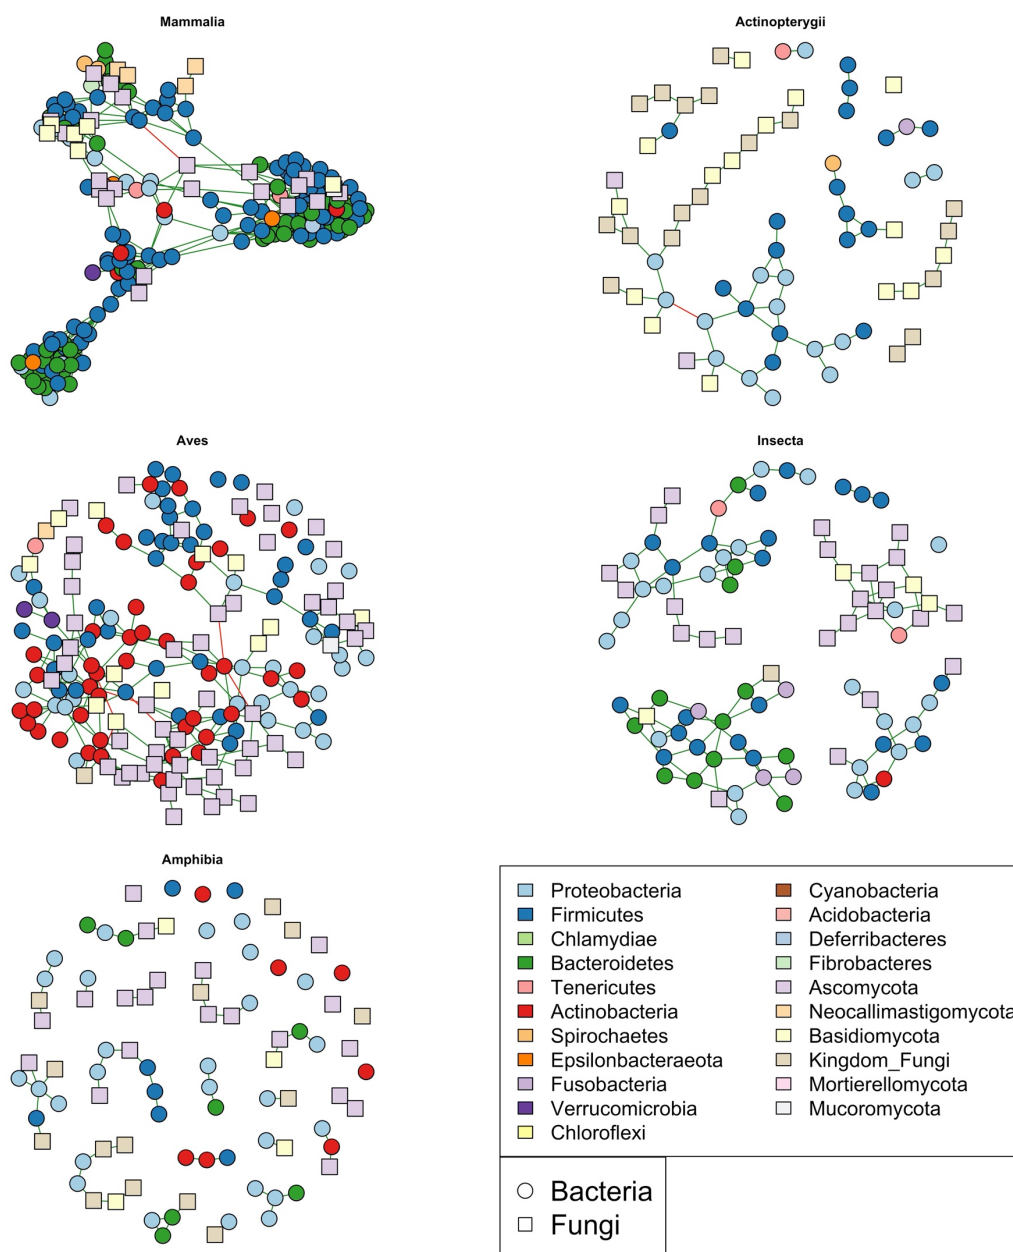

608

609 **FIGURE 3**

610 Putative microbial interaction networks between bacterial (circles) and fungal (squares) taxa, coloured  
611 by microbial phylum. Networks were constructed using the R package *SpiecEasi* on CLR-transformed  
612 abundance values to detect non-random co-occurrence between groups of microbes.

613

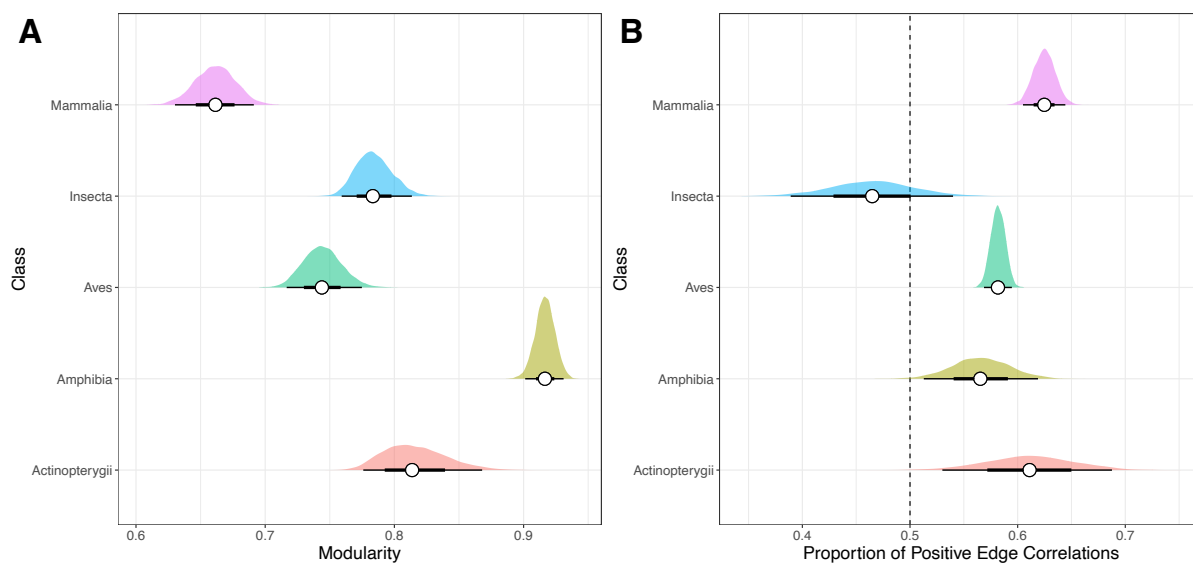

614

615 **FIGURE 4**

616 Analysis of network structural traits of five metazoan classes comprising 39 species. There were  
617 significant differences in **(A)** network modularity; and **(B)** proportion of positive edges (correlations  
618 between paired microbial abundance values) among classes. Vertical dashed line indicates equal  
619 proportion of positive and negative edges.

620

621  
622  
623

**TABLE 1:** Details of host species and their origins, sex ratios, sample sizes and types, and storage and extraction methods for the study.

| Class          | Common name                | Latin name                     | N  | Sex ratio (M: F: J: unknown: N/A) | Captive or Wild | Origin                                             | Sample Type         | Collection Year | Tissue Storage                      | Extraction Kit                                             |
|----------------|----------------------------|--------------------------------|----|-----------------------------------|-----------------|----------------------------------------------------|---------------------|-----------------|-------------------------------------|------------------------------------------------------------|
| Demospongia    | Vase sponge                | <i>Ircinia campana</i>         | 10 | 0: 0: 0: 0: 10                    | Wild            | Long Key, Florida, USA                             | Tissue (choanosome) | 2014            | 95% ethanol                         | Qiagen Blood and Tissue kit with proteinase K              |
| Demospongia    | Golfball sponge            | <i>Tethya aurantium</i>        | 10 | 0: 0: 0: 0: 10                    | Wild            | Long Key, Florida, USA                             | Tissue (choanosome) | 2014            | 95% ethanol                         | Qiagen Blood and Tissue kit with proteinase K              |
| Arachnida      | Hard tick                  | <i>Amblyomma rotundatum</i>    | 10 | 0: 0: 0: 10: 0                    | Wild            | Montserrat, Caribbean                              | Whole organism      | 2014            | 70% ethanol                         | Alkaline digest and ethanol precipitation                  |
| Malacostraca   | Blue swimming crab         | <i>Portunus segnis</i>         | 5  | 0: 0: 0: 5: 0                     | Wild            | Malta                                              | Gut                 | 2018            | 70% ethanol                         | Qiagen QIAamp Fast DNA Stool Mini kit                      |
| Malacostraca   | Brown shrimp               | <i>Crangon crangon</i>         | 10 | 0: 0: 0: 10: 0                    | Wild            | Liverpool, Lancashire, England                     | Gut                 | 2018            | Buffer AE and frozen at -20°C       | Qiagen Blood and Tissue kit with proteinase K              |
| Insecta        | Cockroach                  | <i>Diploptera punctata</i>     | 11 | 7: 1: 0: 3: 0                     | Captive         | Manchester Metropolitan University, Manchester, UK | Gut                 | 2018            | Liquid nitrogen and frozen at -80°C | Qiagen Blood and Tissue kit with proteinase K and lysozyme |
| Insecta        | Honey bee                  | <i>Apis mellifera</i>          | 10 | 0: 10: 0: 0: 0                    | Wild            | North West of England, UK                          | Gut                 | 2016            | 100% ethanol and frozen at -20°C    | Qiagen Blood and Tissue kit with proteinase K and lysozyme |
| Insecta        | Tsetse fly                 | <i>Glossina fuscipes</i>       | 9  | 2: 7: 0: 0: 0                     | Wild            | Patira East, Uganda                                | Whole organism      | 2019            | 70% ethanol                         | Qiagen Blood and Tissue kit with proteinase K              |
| Insecta        | African palm weevil larvae | <i>Rhynchophorus phoenicis</i> | 6  | 0: 0: 0: 6: 0                     | Wild            | Sapele Town, Delta State, Nigeria                  | Gut                 | 2019            | Frozen at -20°C                     | ZymoBIOMICS DNA mini kit                                   |
| Actinopterygii | European eel               | <i>Anguilla anguilla</i>       | 10 | 0: 0: 0: 10: 0                    | Wild            | Cumbria, England                                   | Gut                 | 2009            | Frozen at -20°C                     | Qiagen PowerSoil kit                                       |
| Actinopterygii | Foureye butterflyfish      | <i>Chaetodon capistratus</i>   | 10 | 0: 0: 0: 10: 0                    | Wild            | Bocas del Toro, Bahia Almirante, Panama            | Gut                 | 2018            | 95% ethanol                         | Qiagen PowerSoil kit with proteinase K                     |
| Actinopterygii | Yellowhead wrasse          | <i>Halichoeres garnoti</i>     | 10 | 0: 0: 0: 10: 0                    | Wild            | Caye Caulker, Belize                               | Gut                 | 2015            | 95% ethanol                         | Qiagen PowerSoil kit with proteinase K                     |
| Actinopterygii | Barred hamlet              | <i>Hypoplectrus puella</i>     | 12 | 0: 0: 0: 12: 0                    | Wild            | Bocas del Toro, Bahia Almirante, Panama            | Gut                 | 2018            | 95% ethanol                         | Qiagen PowerSoil kit with proteinase K                     |
| Amphibia       | Common midwife toad        | <i>Alytes obstetricans</i>     | 11 | 0: 0: 0: 11: 0                    | Captive         | London Zoo, London, UK                             | Skin swab           | 2015            | Frozen at -20°C                     | Qiagen DNEasy kit                                          |
| Amphibia       | Phofung river frog         | <i>Amietia hymenopus</i>       | 10 | 0: 0: 10: 0: 0                    | Wild            | Drakensberg National Park, South Africa            | Tadpole mouthparts  | 2015            | 95% ethanol                         | Qiagen Blood and Tissue kit with proteinase K              |
| Amphibia       | Common toad                | <i>Bufo bufo</i>               | 10 | 0: 0: 10: 0: 0                    | Wild            | Norway                                             | Whole organism      | 2009            | 70% ethanol                         | Phenol chlorophorm                                         |
| Amphibia       | Great-crested newt         | <i>Triturus cristatus</i>      | 10 | 5: 5: 0: 0: 0                     | Wild            | Lancashire, England                                | Toe clip            | 2015            | 70% ethanol                         | Phenol chlorophorm                                         |
| Aves           | Reed warbler               | <i>Acrocephalus scirpaceus</i> | 8  | 3: 3: 0: 2: 0                     | Wild            | Lincolnshire, UK                                   | Faeces              | 2018/19         | Frozen at -20°C                     | Qiagen PowerSoil Pro kit                                   |
| Aves           | Light-bellied brent goose  | <i>Branta bernicla hrota</i>   | 10 | 0: 0: 0: 10: 0                    | Wild            | Iceland                                            | Faeces              | 2017            | Frozen at -20°C                     | Qiagen PowerSoil kit                                       |

|          |                             |                                  |    |                |         |                                                  |        |         |                                  |                                       |
|----------|-----------------------------|----------------------------------|----|----------------|---------|--------------------------------------------------|--------|---------|----------------------------------|---------------------------------------|
| Aves     | Goldfinch                   | <i>Carduelis carduelis</i>       | 8  | 5: 1: 0: 2: 0  | Wild    | Lincolnshire, UK                                 | Faeces | 2018/19 | Frozen at -20°C                  | Qiagen PowerSoil Pro kit              |
| Aves     | Stock dove                  | <i>Columba oenas</i>             | 10 | 0: 0: 0: 10: 0 | Wild    | East Anglia, UK                                  | Faeces | 2014    | Frozen at -20°C                  | Qiagen QIAamp Fast DNA Stool Mini kit |
| Aves     | Woodpigeon                  | <i>Columba palumbus</i>          | 5  | 0: 0: 0: 5: 0  | Wild    | East Anglia, UK                                  | Faeces | 2012    | Frozen at -20°C                  | Qiagen QIAamp Fast DNA Stool Mini kit |
| Aves     | Carrion crow                | <i>Corvus corone</i>             | 12 | 0: 0: 0: 12: 0 | Wild    | Cumbria, UK                                      | Gut    | 2019    | Frozen at -20°C                  | Qiagen Microbiome kit                 |
| Aves     | Blue tit                    | <i>Cyanistes caeruleus</i>       | 8  | 0: 0: 0: 8: 0  | Wild    | Lincolnshire, UK                                 | Faeces | 2018    | Frozen at -20°C                  | Qiagen PowerSoil Pro kit              |
| Aves     | Yellowhammer                | <i>Emberiza citrinella</i>       | 8  | 1: 1: 0: 6: 0  | Wild    | Lincolnshire, UK                                 | Faeces | 2018    | Frozen at -20°C                  | Qiagen PowerSoil Pro kit              |
| Aves     | Reed bunting                | <i>Emberiza schoeniclus</i>      | 8  | 4: 3: 0: 1: 0  | Wild    | Lincolnshire, UK                                 | Faeces | 2018    | Frozen at -20°C                  | Qiagen PowerSoil Pro kit              |
| Aves     | Robin                       | <i>Erithacus rubecula</i>        | 8  | 1: 1: 0: 6: 0  | Wild    | Lincolnshire, UK                                 | Faeces | 2018    | Frozen at -20°C                  | Qiagen PowerSoil Pro kit              |
| Aves     | Great tit                   | <i>Parus major</i>               | 8  | 3: 3: 0: 2: 0  | Wild    | Lincolnshire, UK                                 | Faeces | 2018/19 | Frozen at -20°C                  | Qiagen PowerSoil Pro kit              |
| Aves     | Chiffchaff                  | <i>Phylloscopus collybita</i>    | 8  | 0: 1: 0: 7: 0  | Wild    | Lincolnshire, UK                                 | Faeces | 2018/19 | Frozen at -20°C                  | Qiagen PowerSoil Pro kit              |
| Aves     | Collared dove               | <i>Streptopelia decaocto</i>     | 8  | 0: 0: 0: 8: 0  | Wild    | East Anglia, UK                                  | Faeces | 2014    | Frozen at -20°C                  | Qiagen QIAamp Fast DNA Stool Mini kit |
| Aves     | Turtle dove                 | <i>Streptopelia turtur</i>       | 7  | 0: 0: 0: 7: 0  | Wild    | East Anglia, UK                                  | Faeces | 2014    | Frozen at -20°C                  | Qiagen QIAamp Fast DNA Stool Mini kit |
| Aves     | Blackcap                    | <i>Sylvia atricapilla</i>        | 8  | 3: 2: 0: 3: 0  | Wild    | Lincolnshire, UK                                 | Faeces | 2018    | Frozen at -20°C                  | Qiagen PowerSoil Pro kit              |
| Aves     | Song thrush                 | <i>Turdus philomelos</i>         | 8  | 0: 0: 0: 8: 0  | Wild    | Lincolnshire, UK                                 | Faeces | 2018    | Frozen at -20°C                  | Qiagen PowerSoil Pro kit              |
| Mammalia | Striped field mouse         | <i>Apodemus agrarius</i>         | 10 | 5: 5: 0: 0: 0  | Wild    | Chernobyl Exclusion Zone, Ukraine                | Faeces | 2017    | 100% ethanol and frozen at -20°C | Invitrogen Microbiome kit             |
| Mammalia | Yellow-necked mouse         | <i>Apodemus flavicollis</i>      | 10 | 5: 5: 0: 0: 0  | Wild    | Chernobyl Exclusion Zone, Ukraine                | Faeces | 2017    | 100% ethanol and frozen at -20°C | Invitrogen Microbiome kit             |
| Mammalia | Wood mouse                  | <i>Apodemus sylvaticus</i>       | 10 | 6: 4: 0: 0: 0  | Wild    | Chernobyl Exclusion Zone, Ukraine                | Faeces | 2017    | 100% ethanol and frozen at -20°C | Invitrogen Microbiome kit             |
| Mammalia | Northern muriqui            | <i>Brachyteles hypoxanthus</i>   | 10 | 0: 0: 0: 10: 0 | Wild    | Caparao National Park, Espirito Santo, Brazil    | Faeces | 2017/18 | RNA Later and frozen at -20°C    | Qiagen QIAamp Fast DNA Stool Mini kit |
| Mammalia | Roe deer                    | <i>Capreolus capreolus</i>       | 7  | 7: 0: 0: 0: 0  | Wild    | Cumbria, UK                                      | Faeces | 2019    | Frozen at -20°C                  | Qiagen Microbiome kit                 |
| Mammalia | Red deer                    | <i>Cervus elaphus</i>            | 10 | 0: 0: 0: 10: 0 | Wild    | County Meath, Ireland                            | Faeces | 2018    | Frozen at -20°C                  | Qiagen QIAamp Fast DNA Stool Mini kit |
| Mammalia | Greater white-toothed shrew | <i>Crocidura russula</i>         | 10 | 5: 5: 0: 0: 0  | Wild    | Belle Ile, France                                | Gut    | 2018    | 100% ethanol and frozen at -20°C | Qiagen PowerSoil kit                  |
| Mammalia | Eastern black rhino         | <i>Diceros bicornis michaeli</i> | 10 | 0: 10: 0: 0: 0 | Captive | Chester Zoo and Port Lympne Wild Animal Park, UK | Faeces | 2011    | Frozen at -20°C                  | Qiagen QIAamp Fast DNA Stool Mini kit |
| Mammalia | Wild pony                   | <i>Equus ferus caballus</i>      | 10 | 5: 5: 0: 0: 0  | Wild    | Snowdonia National Park, Wales                   | Faeces | 2013    | Frozen at -20°C                  | Qiagen QIAamp Fast DNA Stool Mini kit |
| Mammalia | Hedgehog                    | <i>Erinaceus europaeus</i>       | 12 | 0: 0: 0: 12: 0 | Wild    | Cumbria, UK                                      | Faeces | 2019    | Frozen at -20°C                  | Qiagen Microbiome kit                 |

|          |                      |                                 |    |                |      |                                                         |        |      |                                  |                                       |
|----------|----------------------|---------------------------------|----|----------------|------|---------------------------------------------------------|--------|------|----------------------------------|---------------------------------------|
| Mammalia | Bank vole            | <i>Myodes glareolus</i>         | 10 | 7: 3: 0: 0: 0  | Wild | Chernobyl, Ukraine                                      | Gut    | 2017 | 100% ethanol and frozen at -20°C | Invitrogen Microbiome kit             |
| Mammalia | Lesser horseshoe bat | <i>Rhinolophus hipposideros</i> | 10 | 3: 5: 2: 0: 0  | Wild | County Kerry, Ireland                                   | Faeces | 2016 | Frozen at -20°C                  | Zymo DNA Extraction kit               |
| Mammalia | Capuchin monkey      | <i>Sapajus libidinosus</i>      | 10 | 0: 0: 0: 10: 0 | Wild | Serra Talhada, State of Pernambuco/Minas Gerais, Brazil | Faeces | 2017 | Frozen at -20°C                  | Qiagen QIAamp Fast DNA Stool Mini kit |
| Mammalia | Grey squirrel        | <i>Sciurus carolinensis</i>     | 12 | 0: 0: 0: 12: 0 | Wild | Cumbria, UK                                             | Faeces | 2019 | Frozen at -20°C                  | Qiagen Microbiome kit                 |
| Mammalia | Red squirrel         | <i>Sciurus vulgaris</i>         | 12 | 0: 0: 0: 12: 0 | Wild | Cumbria, UK                                             | Faeces | 2019 | Frozen at -20°C                  | Qiagen Microbiome kit                 |
| Mammalia | Pygmy shrew          | <i>Sorex minutus</i>            | 10 | 5: 5: 0: 0: 0  | Wild | Belle Ile, France                                       | Gut    | 2018 | 100% ethanol and frozen at -20°C | Qiagen PowerSoil kit                  |

624  
625

626

627 **TABLE 2**

628 PERMANOVA results for (a) fungi and (b) bacteria of factors explaining variation in microbial  
 629 community structure. Terms were added in the order shown in the table to marginalise effects of  
 630 sample storage and preparation protocols before calculating % variance explained for taxonomic  
 631 groupings. Species ID was the dominant source of variation in the data for both taxonomic groups, but  
 632 there were also strong effects of sample storage and wet lab protocol, particularly for bacteria.

633

| <b>(a) FUNGI</b> |           |           |                | <b>Taxonomic Effects Only</b> |           |                |
|------------------|-----------|-----------|----------------|-------------------------------|-----------|----------------|
| <b>Predictor</b> | <b>df</b> | <b>R2</b> | <b>p value</b> | <b>df</b>                     | <b>R2</b> | <b>p value</b> |
| Sample Type      | 7         | 0.05      | 0.001          |                               |           |                |
| Tissue Storage   | 5         | 0.04      | 0.001          |                               |           |                |
| Extraction Kit   | 7         | 0.07      | 0.001          |                               |           |                |
| Class            | 2         | 0.02      | 0.001          | 6                             | 0.05      | 0.001          |
| Order            | 6         | 0.05      | 0.001          | 13                            | 0.12      | 0.001          |
| Species          | 18        | 0.09      | 0.001          | 26                            | 0.14      | 0.001          |
| Residuals        | 303       | 0.68      |                | 303                           | 0.68      |                |

| <b>(b) BACTERIA</b> |           |           |                | <b>Taxonomic Effects Only</b> |           |                |
|---------------------|-----------|-----------|----------------|-------------------------------|-----------|----------------|
| <b>Predictor</b>    | <b>df</b> | <b>R2</b> | <b>p value</b> | <b>df</b>                     | <b>R2</b> | <b>p value</b> |
| Sample Type         | 6         | 0.06      | 0.001          |                               |           |                |
| Tissue Storage      | 6         | 0.16      | 0.001          |                               |           |                |
| Extraction Kit      | 7         | 0.12      | 0.001          |                               |           |                |
| Class               | 2         | 0.02      | 0.001          | 6                             | 0.09      | 0.001          |
| Order               | 6         | 0.09      | 0.001          | 12                            | 0.21      | 0.001          |
| Species             | 18        | 0.12      | 0.001          | 27                            | 0.27      | 0.001          |
| Residuals           | 273       | 0.42      |                | 273                           | 0.42      |                |

634

635
